# Supplementary material for: Silencing of Euchromatic Transposable Elements as a Consequence of Nuclear Lamina Dysfunction
Source: PubMed Central journal article supplement (PMC7140440; doi:10.3390/cells9030625), 2020-03-05
Supplement: cells-09-00625-s001.pdf [file cells-09-00625-s001.pdf]

Supplementary Materials:

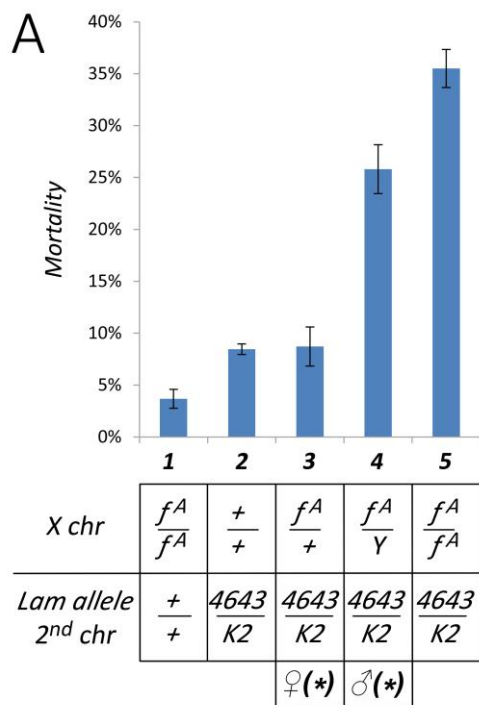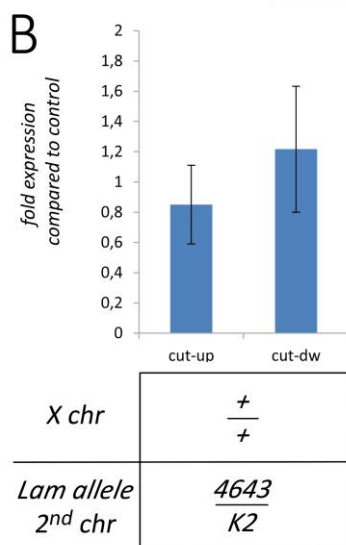

**Figure S1.** The *gypsy* insertion in the *forked* (*f*) locus increases the mortality rate induced by *Lam* inactivation. **(A)** Mortality during adult eclosion of pharate with different genotypes. Columns 1–5: flies with X chromosomes carrying the *flamenco* permissive allele *flam<sup>A</sup>*, which allows *gypsy* activation. These flies can have the *gypsy* induced mutation (*f<sup>A</sup>*) in heterozygosis, in homozygosis/hemizygososis or the wild type allele (+). Flies can be homozygous for the wild type *Lam* allele (+/+) or transheterozygous (4643/K2). Y: Y chromosome. Asterisk: females and males derived from the same genetic cross. **(B)** Strand-specific qRT-PCR analysis of the transcription levels in the genomic regions containing the *gypsy* insertion site of the *ct<sup>A</sup>* allele in *w<sup>+</sup>; Lam<sup>4643/K2</sup>* female head tissues compared to the *w<sup>+</sup>; Lam<sup>+</sup>* control. The two strand-specific primers used for RT experiments were the same of Fig. 1G, while the two qPCR couples of primers were designed in *cut* genomic regions (see tab. S1).

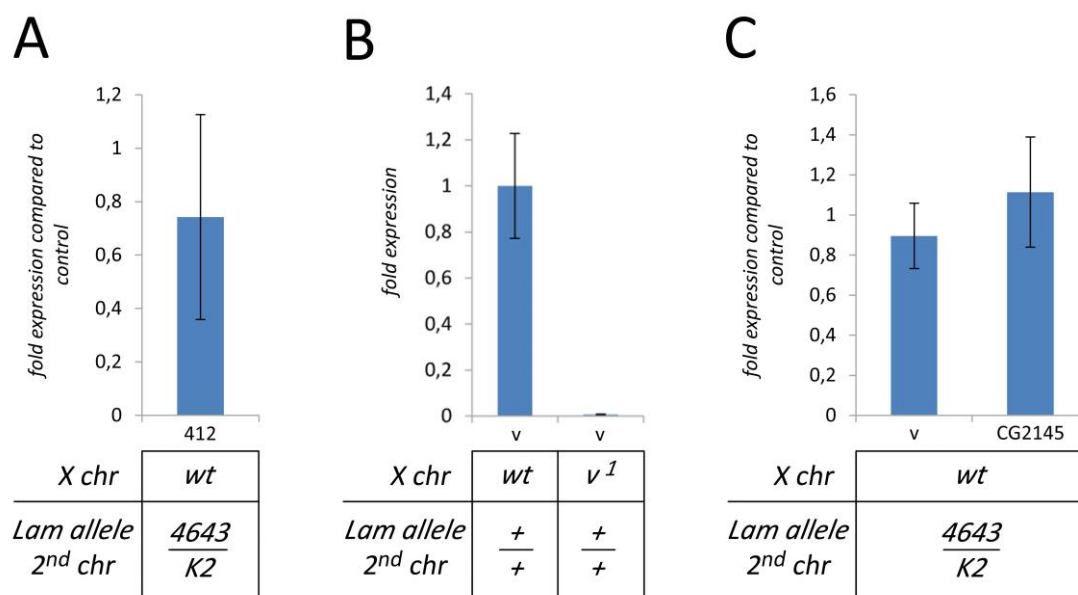

**Figure S2.** *Lam* inactivation does not affect the expression of the 412 retrotransposon element, of *vermilion* (*v*) and CG2155 genes in the wild type genetic background. (A–C) qRT-PCR analysis of RNAs isolated from female head tissues. Data are mean values from three independent experiments, and error bars indicate SD. (A) Expression level of the 412 element in *Lam*<sup>4643/K2</sup> mutants (4643/K2) compared to control flies (+/+) in the wild type genetic background. (B) Effect of the mutation induced by the 412 element, which produces the *v*<sup>1</sup> allele on the expression of the *vermilion* gene. (C) Expression levels of *vermilion* and CG2145 in *Lam*<sup>4643/K2</sup> mutants (4643/K2) compared to control flies (+/+) in the wild type genetic background.

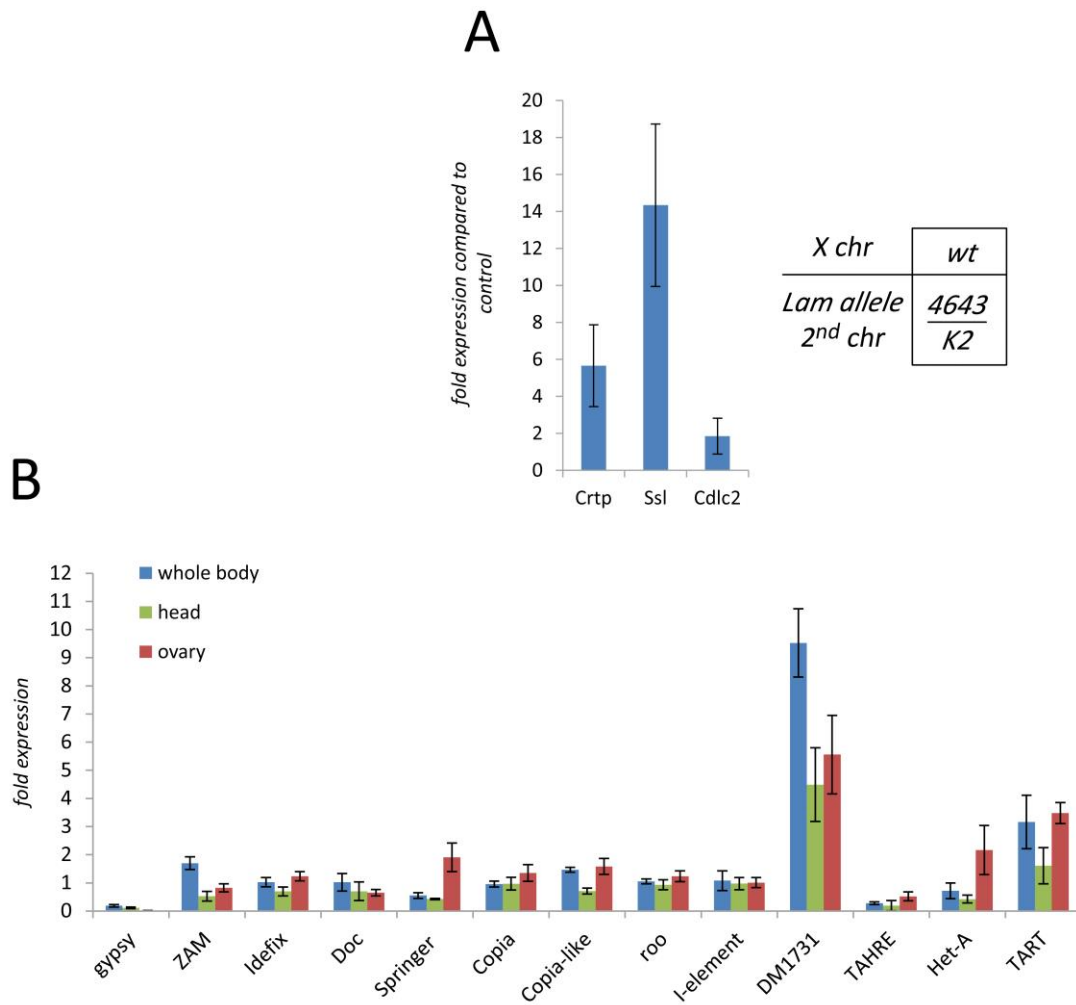

**Figure S3.** Expression of testis specific genes in the wild type genetic background and of TEs in whole females, somatic tissues, and ovaries. **(A)** qRT-PCR expression analysis of testis specific genes comparing  $w^+$ ;  $Lam^{4643/K2}$  with  $w^+$ ;  $Lam^+$  somatic tissues. **(B)** Compared expression of the different TEs in  $flam^A$ ;  $lam^{4643/K2}$  mutants.

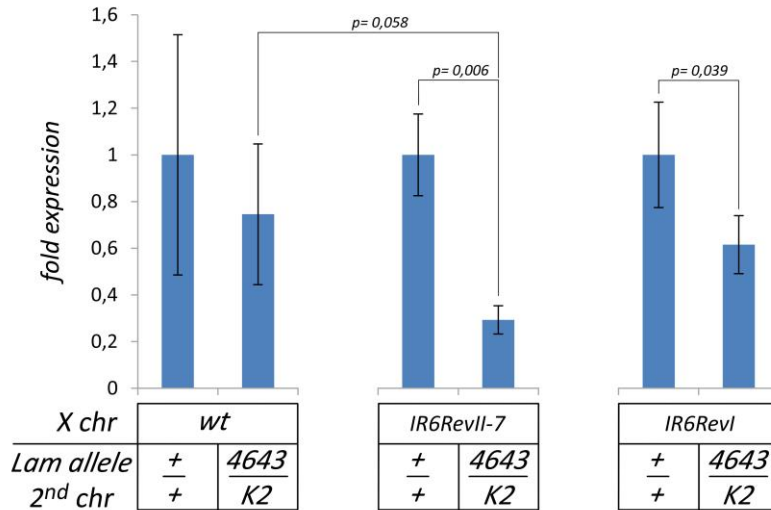

**Figure S4.** Silencing of the *white* gene is induced by TEs located in the 5' untranscribed region. qRT-PCR analysis of *white* expression in RNAs isolated from female head tissues of *Lam*<sup>4643/K2</sup> mutants (4643/K2) compared to control flies (+/+) in different *white* genetic backgrounds. Data are mean values from three independent experiments, and error bars indicate SD. The p-value has been calculated by one-tail Student's t-test.

**Table S1.** Primer sequences used in this study

| Primers for<br>RT       | Forward Primer              | Reverse Primer                 |
|-------------------------|-----------------------------|--------------------------------|
| rp49-RT <sup>1</sup>    | 5' GACAATCTCCTTGGCCTTCT 3'  |                                |
| cut-RT up <sup>1</sup>  | 5' CGGAGAGTTCGGCATTG 3'     |                                |
| cut-RT dw <sup>1</sup>  |                             | 5' CAAGGGGTTGCCTCTCATT 3'      |
| white-fr                | 5'CAGATGCTCGGCAGATGG3'      |                                |
| white-re                |                             | 5'ACACAAAGTGCTGTGCCAAA3'       |
| Primers for<br>qPCR     |                             |                                |
| rp49 <sup>1</sup>       | 5' TCTGCATGAGCAGGACCTC 3'   | 5' ATCGTTACGGATCGAACAA3'       |
| gypsy <sup>1</sup>      | 5' AGACGCTGCGACCATTAC 3'    | 5' CGTGCTGCCTCCAGAATGAT 3'     |
| cut-gyp up <sup>1</sup> | 5' GGGCTGGGAATAGAAAAC 3'    | 5' TTCATCCCAACTCTTAAAACGAA 3'  |
| cut-gyp dw <sup>1</sup> | 5' ATCCCCAAAAGGAAGTGAT 3'   | 5' AAATGCGCGAAATCTCTCAG 3'     |
| cut-up <sup>1</sup>     | 5' GGGCTGGGAATAGAAAAC 3'    | 5' TTCATCCCAACTCTTAAAACGAA 3'  |
| cut-dw <sup>1</sup>     | 5' ATCCCCAAAAGGAAGTGAT 3'   | 5' AAATGCGCGAAATCTCTCAG 3'     |
| flam1 <sup>1</sup>      | 5' TCAAAGCGATTATTCTCAG 3'   | 5' CCATTTGGCTATGAGGATCAG 3'    |
| flam5 <sup>1</sup>      | 5' CAGCCCCCTATTGATTAGAT 3'  | 5' TGCTCGGGCTTTCTTAAAGT 3'     |
| flam6 <sup>1</sup>      | 5' GTATATCGGATGGCCGATTG 3'  | 5' GCACCGCAAATCATAACGTA 3'     |
| white                   | 5' CCGCGAATTAATAGCTCCTG 3'  | 5' ATTGGGGTGGTGATTGGTT 3'      |
| I-element               | 5' ACGAATCGGGTACGAAACAG 3'  | 5' TTGCATATGGGTGTTGGATG 3'     |
| ZAM                     | 5' CTAGACGGGACAGGGAACAG 3'  | 5'GATGGGGTATCTGTCCGAAA 3'      |
| Idefix <sup>1</sup>     | 5' GAATGATTCCGCTCTAGTGG 3'  | 5' ATGCGGTCTCTTTCTTCTGC 3'     |
| 412                     | 5' CGCAAAACAGATCAACACAAG 3' | 5' TAGCACACTGTTTGCCTCC 3'      |
| Doc                     | 5' TCAGAAACGCACCTCACAAA 3'  | 5' GTGCCTCCATGAGCTTACC 3'      |
| Springer                | 5' CTGGAGGAACCTCGCCAACAT 3' | 5' CTACGTCGTCCTGGATTAGC 3'     |
| copia <sup>1</sup>      | 5' TCTGGTGCTAGTGACCATCT 3'  | 5' GCTTGGCCACTGCAATCTTA 3'     |
| copia-like              | 5' CTCTACGCTGGACAACCAAT 3'  | 5' CTTGTGTCGACTTCGTACTC 3'     |
| roo                     | 5' CCTCGCAGTAGCGAGTCAGT 3'  | 5' GAACGGAGCCAAAATTGTA 3'      |
| DM1731                  | 5' GAGAAATCACTTTGGGCCAT 3'  | 5' TCGTCGCTGGTCTACAGTTC 3'     |
| TAHRE                   | 5' ATCCAGGCCAAGGATATGAC 3'  | 5' TCTGATGATGACTCGGAAGC 3'     |
| Het-A                   | 5' ACAGATGCCAAGGCTTCAGG 3'  | 5' GCCAGCGCATTTTCATGC 3'       |
| TART                    | 5' TTCCGAGATCCAATCTTCGT 3'  | 5' GGGCATCAATATTTAGAATGAACA 3' |
| w-Idefix                | 5' CCGCACAGTCACACCTACAT 3'  | 5' AAGGTTCCGGTGTCTTCTCAA 3'    |
| Idefix-w                | 5' ATGGCTGGGACTTACCTTT 3'   | 5' TTGGGTACATCCGGAGTAGTG 3'    |
| v-412                   | 5' GAGGAGTCACGGGCTAAC 3'    | 5' GGCAGCACTTTGTTGCTATG 3'     |
| CG2145                  | 5' GCAGTGTTTTTGTGCTGAC 3'   | 5' GCTGGACTTCTTGGTTGTCG 3'     |
| Crtp                    | 5' CTCCAAGAGAAGGCGGAGA 3'   | 5' GTGGCTCCATAGCGACTGT 3'      |
| Ssl                     | 5' TGCCAAGCTTGATACCCTCT 3'  | 5' ACCTTTATTGGCGGGGACT 3'      |
| Cd1c2                   | 5' AACAGAGCAAGAGCCGATA 3'   | 5' TGTCAGCGTCTTGTGATCACC 3'    |

Primers design was performed using Primer 3 [1]

<sup>1</sup>[2]

**Table S2.** Phenotypes of *Lam* mutants

| Phenotype                                  | <i>Lam</i> <sup>4643/+</sup> | <i>Lam</i> <sup>4643/4643</sup> | <i>Lam</i> <sup>K2/+</sup> | <i>Lam</i> <sup>K2/K2</sup> | <i>Lam</i> <sup>4643/K2</sup> |
|--------------------------------------------|------------------------------|---------------------------------|----------------------------|-----------------------------|-------------------------------|
| <sup>1</sup> adult-pharate lethality % (n) | 1,0 (311)                    | 63,7 (118)                      | 0,3 (325)                  | 56,3 (109)                  | 8,4 (356)                     |
| <sup>2</sup> locomotor defects             | -                            | +                               | -                          | +                           | +                             |
| <sup>2</sup> eye defects                   | -                            | +                               | -                          | +                           | +                             |
| <sup>2</sup> female sterility              | -                            | +                               | -                          | +                           | +                             |
| <sup>2</sup> ovary defects                 | -                            | +                               | -                          | +                           | +                             |
| <sup>2</sup> premature aging               | -                            | +                               | -                          | +                           | +                             |

Phenotypes of *Lam* mutants in the *flam*<sup>A</sup> genetic background that we used in this study.

<sup>1</sup>Homozygous for *Lam* loss-of-function alleles show higher level of lethality during the adult-pharate stage respect to the *Lam*<sup>4643/K2</sup> transheterozygous combination. This probably depends on the homozygosity of the second chromosome, which carries the *Lam* locus. To minimize the genetic background effects that derive from homozygous chromosomes, we used the *Lam*<sup>4643/K2</sup> transheterozygous combination for our genetic analysis. (n): total number of adult-pharate analyzed.

<sup>2</sup>(-): flies that do not show the phenotype. (+): flies that show a full penetrant phenotype.

## References

1. Untergasser, A.; Cutcutache, I.; Koressaar, T.; Ye, J.; Faircloth, B.C.; Remm, M.; Rozen, S.G. Primer3--new capabilities and interfaces. *Nucleic acids research* **2012**, *40*, e115, doi:10.1093/nar/gks596.
2. Guida, V.; Cernilogar, F.M.; Filograna, A.; De Gregorio, R.; Ishizu, H.; Siomi, M.C.; Schotta, G.; Bellenchi, G.C.; Andrenacci, D. Production of Small Noncoding RNAs from the flamenco Locus Is Regulated by the gypsy Retrotransposon of *Drosophila melanogaster*. *Genetics* **2016**, *204*, 631-644, doi:10.1534/genetics.116.187922.
